# Supplementary material for: Blue emitting BCNO phosphors with high quantum yields
Source: Royal Society of Chemistry journal article supplement (doi:10.1039/c5tc00179j), 2015-01-01
Supplement: c5tc00179j1.pdf [file c5tc00179j1.pdf]

## Blue emitting BCNO phosphors with high quantum yields

Xinghua Zhang <sup>a,b,\*</sup>, Zunming Lu <sup>a,b</sup>, Hui Liu <sup>a,b</sup>, Jing Lin <sup>a,b</sup>, Xuewen Xu <sup>a,b</sup>, Fanbin Meng <sup>a,b</sup>, Jianling Zhao <sup>a,b</sup>, and Chengchun Tang <sup>a,b</sup>

<sup>a</sup> School of Materials Science and Engineering, Hebei University of Technology, Tianjin, China.

<sup>b</sup> Key Laboratory of Micro- and Nano-scale Boron Nitride Materials of Hebei Province.

\* E-mail: xinghua146@aliyun.com; Tel: +86 022-60204805; Fax: +86 022-60202660.

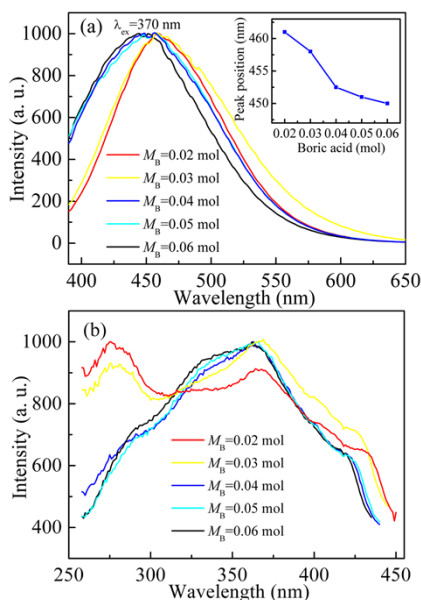

Fig. S1. (a) Normalized emission spectra and (b) Normalized excitation spectra of BCNO phosphors prepared with  $M_B=0.02-0.06$  mol, the inset of (a) shows the emission peak position versus boric acid concentration.

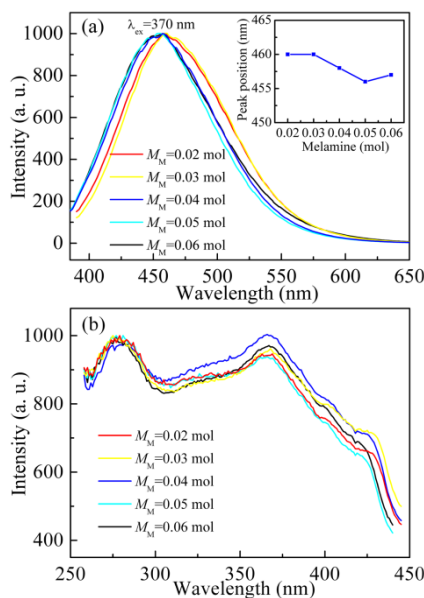

Fig. S2. (a) Normalized Emission spectra of BCNO phosphors prepared with different contents of melamine and emission peak position versus melamine concentration (Inset). (b) Normalized excitation spectra of BCNO phosphors prepared with  $M_M=0.02-0.06$  mol.
